# Supplementary material for: Identification of proteins responsible for adriamycin resistance in breast cancer cells using proteomics analysis
Source: PubMed Central journal article supplement (PMC4377623; doi:10.1038/srep09301), 2015-03-30
Supplement: srep09301-s1.pdf [file srep09301-s1.pdf]

## **Identification of proteins responsible for adriamycin resistance in breast cancer cells using proteomics analysis**

Zhipeng Wang <sup>1</sup>, Shuang Liang <sup>2</sup>, Xin Lian <sup>1</sup>, Lei Liu <sup>3</sup>, Shu Zhao <sup>1</sup>, Qijia Xuan <sup>1</sup>, Li Guo <sup>1</sup>, Hang Liu <sup>1</sup>, Yuguang Yang <sup>1</sup>, Tiejing Dong <sup>1</sup>, Yanchen Liu <sup>1</sup>, Zhaoliang Liu <sup>4</sup>& Qingyuan Zhang <sup>1\*</sup>

**Table S1 | The active pathways were found with KEGG pathway enrichment.**

**Table S2 | Eighty differentially expressed proteins were identified in MCF-7/ADR compared to MCF-7.**

**Table S3 | DEPs were enriched within KEGG pathway.**

**Table S4 | Thirty-two modules were identified in network.**

**Table S5 | Relation of DEPs-one step interacting proteins.**

**Figure S1 |** The molecular weights (MW) of the identified proteins spanned mainly from 10,000 to 200,000 Da. Most proteins had an isoelectric point (pI) between 4 and 10.

**Figure S2 | Functional network of identified the 2<sup>nd</sup> module.** This module contained 20 proteins which were enriched within 11 pathways, among them, there were six pathways associated with resistance, especially MAPK signal pathway. There were five proteins in MAPK signal pathway, including one pair of DEPs-one step interacting protein (HSPB1-DAXX). The yellow node indicates DEPs and the green node indicates one-step interacting protein.

**Figure S3 | DEPs-one step interacting protein relations.** The number of DEPs interacting with one-step protein ranged from 1 to 5. It represented that 425 one-step proteins correlate with 1 DEPs, 63 one-step proteins correlate with 2 DEPs, 9 one-step proteins correlate with 3 DEPs, 4 one-step proteins correlate with 4 DEPs and 1 one-step protein correlate with 5 DEPs in the PPI.

**Table S1 | The active pathways were found with KEGG pathway enrichment.**

| Category     | Term                                           | Count | %           | PValue   | Genes                                                                                                                                                         | FDR      |
|--------------|------------------------------------------------|-------|-------------|----------|---------------------------------------------------------------------------------------------------------------------------------------------------------------|----------|
| KEGG_PATHWAY | hsa05016:Huntington's disease                  | 28    | 4.057971014 | 1.68E-05 | 1350, 10540, 539, 4513, 1347, 515, 1173, 506, 9377, 509, 1329, 581, 293, 1327, 292, 498, 522, 161, 54205, 163, 6389, 1639, 1211, 10476, 1212, 160, 1213, 3065 | 0.020231 |
| KEGG_PATHWAY | hsa05010:Alzheimer's disease                   | 23    | 3.333333333 | 4.88E-04 | 824, 506, 9377, 1350, 823, 509, 1329, 1327, 3028, 498, 488, 522, 54205, 6389, 10476, 2597, 4513, 539, 808, 3416, 1347, 515, 5594                              | 0.585945 |
| KEGG_PATHWAY | hsa04144:Endocytosis                           | 23    | 3.333333333 | 0.002474 | 3304, 10059, 27243, 128866, 382, 1785, 3312, 25978, 29082, 161, 163, 84364, 1211, 10938, 1212, 160, 1213, 3107, 30844, 3310, 1173, 998, 9146                  | 2.940087 |
| KEGG_PATHWAY | hsa04810:Regulation of actin cytoskeleton      | 21    | 3.043478261 | 0.049101 | 2934, 55845, 10672, 1073, 1072, 10093, 7430, 10092, 3688, 1399, 10552, 23191, 8826, 10095, 10094, 81, 60, 10109, 87, 998, 5594                                | 45.4817  |
| KEGG_PATHWAY | hsa03040:Spliceosomes                          | 19    | 2.753623188 | 8.04E-04 | 3304, 4670, 988, 57819, 4116, 3312, 51690, 9775, 1665, 3183, 9879, 1655, 3192, 56259, 3310, 3190, 7919, 9416, 11325                                           | 0.964501 |
| KEGG_PATHWAY | hsa00190:Oxidative phosphorylation             | 19    | 2.753623188 | 0.001167 | 506, 9377, 1350, 1329, 509, 1327, 27068, 9551, 498, 522, 521, 6389, 5464, 10476, 10632, 4513, 539, 1347, 515                                                  | 1.397273 |
| KEGG_PATHWAY | hsa00010:Glycolysis / Gluconeogenesis          | 18    | 2.608695652 | 8.08E-08 | 3098, 128, 223, 226, 1738, 10327, 501, 5213, 5211, 3939, 2597, 2023, 2026, 5315, 2203, 5214, 3945, 2821                                                       | 9.73E-05 |
| KEGG_PATHWAY | hsa04666:Fc gamma R-mediated phagocytosis      | 17    | 2.463768116 | 2.40E-04 | 10059, 2934, 1785, 382, 1073, 1072, 10093, 10092, 4082, 6198, 1399, 10552, 10095, 10094, 10109, 998, 5594                                                     | 0.288696 |
| KEGG_PATHWAY | hsa05012:Parkinson's disease                   | 17    | 2.463768116 | 0.006091 | 506, 9377, 1350, 1329, 509, 293, 1327, 292, 498, 522, 54205, 6389, 10476, 4513, 539, 1347, 515                                                                | 7.096551 |
| KEGG_PATHWAY | hsa04110:Cell cycle                            | 16    | 2.31884058  | 0.011243 | 4173, 10971, 4172, 4175, 2810, 4174, 4176, 1029, 4171, 983, 9184, 7534, 3065, 7533, 7532, 7531                                                                | 12.73646 |
| KEGG_PATHWAY | hsa00480:Glutathione metabolism                | 14    | 2.028985507 | 8.09E-06 | 2936, 2937, 9446, 51056, 290, 4257, 373156, 2950, 2539, 3418, 79017, 3417, 2947, 5226                                                                         | 0.009742 |
| KEGG_PATHWAY | hsa05130:Pathogenic Escherichia coli infection | 14    | 2.028985507 | 3.73E-05 | 10971, 3875, 10093, 10092, 7430, 3688, 10552, 10095, 10094, 7534, 60, 10109, 998, 999                                                                         | 0.044956 |
| KEGG_PATHWAY | hsa04142:Lysosomes                             | 13    | 1.884057971 | 0.062791 | 8546, 967, 2799, 1522, 164, 1211, 1212, 1213, 3920, 1509, 3074, 1508, 3073                                                                                    | 54.22146 |
| KEGG_PATHWAY | hsa04722:Neurotrophin signaling pathway        | 13    | 1.884057971 | 0.088682 | 10971, 817, 581, 1399, 2885, 396, 7534, 7533, 808, 7532, 7531, 998, 5594                                                                                      | 67.33631 |

|              |                                                                 |    |             |          |                                                                      |          |
|--------------|-----------------------------------------------------------------|----|-------------|----------|----------------------------------------------------------------------|----------|
| KEGG_PATHWAY | hsa00620:Pyruvate metabolism                                    | 12 | 1.739130435 | 2.29E-05 | 4199, 223, 3939, 9380, 1738, 4191, 231, 4190, 3029, 5315, 501, 3945  | 0.027595 |
| KEGG_PATHWAY | hsa00520:Amino sugar and nucleotide sugar metabolism            | 11 | 1.594202899 | 3.07E-04 | 64841, 3098, 2584, 2673, 10007, 5238, 3074, 29926, 2821, 3073, 29925 | 0.369145 |
| KEGG_PATHWAY | hsa04612:Antigen processing and presentation                    | 11 | 1.594202899 | 0.034257 | 811, 3304, 3320, 3107, 3310, 3312, 3309, 3326, 821, 3308, 1508       | 34.29519 |
| KEGG_PATHWAY | hsa05322:Systemic lupus erythematosus                           | 11 | 1.594202899 | 0.091654 | 718, 85235, 8968, 9555, 720, 85236, 81, 8359, 3015, 6741, 87         | 68.59685 |
| KEGG_PATHWAY | hsa00020:Citrate cycle (TCA cycle)                              | 10 | 1.449275362 | 8.10E-05 | 6389, 47, 3419, 1431, 3418, 1738, 3417, 4191, 4190, 50               | 0.097603 |
| KEGG_PATHWAY | hsa00051:Fructose and mannose metabolism                        | 10 | 1.449275362 | 1.78E-04 | 3098, 226, 231, 29926, 5214, 6652, 2203, 5213, 29925, 5211           | 0.2145   |
| KEGG_PATHWAY | hsa00071:Fatty acid metabolism                                  | 10 | 1.449275362 | 6.64E-04 | 3033, 1892, 3032, 128, 223, 1374, 3030, 1632, 501, 37                | 0.797312 |
| KEGG_PATHWAY | hsa05412:Arrhythmogenic right ventricular cardiomyopathy (ARVC) | 10 | 1.449275362 | 0.047634 | 1832, 3688, 1674, 2010, 81, 60, 87, 1495, 4000, 488                  | 44.45962 |
| KEGG_PATHWAY | hsa04520:Adherens junction                                      | 10 | 1.449275362 | 0.051093 | 1457, 8826, 1460, 81, 60, 87, 1495, 998, 999, 5594                   | 46.84186 |
| KEGG_PATHWAY | hsa04260:Cardiac muscle contraction                             | 10 | 1.449275362 | 0.054713 | 9377, 1350, 1329, 483, 481, 4513, 1327, 476, 1347, 488               | 49.23455 |
| KEGG_PATHWAY | hsa00030:Penrose phosphate pathway                              | 9  | 1.304347826 | 9.47E-05 | 2539, 226, 25796, 5214, 2203, 5213, 2821, 5211, 5226                 | 0.114025 |
| KEGG_PATHWAY | hsa00280:Valine, leucine and isoleucine degradation             | 9  | 1.304347826 | 0.005436 | 3033, 1892, 3032, 223, 3030, 1738, 64087, 501, 3028                  | 6.356922 |
| KEGG_PATHWAY | hsa00330:Arginine and proline metabolism                        | 9  | 1.304347826 | 0.016641 | 445, 223, 2806, 1152, 51056, 2746, 501, 2744, 2805                   | 18.3065  |
| KEGG_PATHWAY | hsa00270:Cysteine and methionine metabolism                     | 8  | 1.15942029  | 0.004496 | 3939, 27430, 58478, 2806, 4144, 1786, 3945, 2805                     | 5.284791 |
| KEGG_PATHWAY | hsa00250:Alanine, aspartate and glutamate metabolism            | 7  | 1.014492754 | 0.011425 | 445, 440, 2673, 2806, 2746, 2744, 2805                               | 12.92986 |
| KEGG_PATHWAY | hsa03030:DNA replication                                        | 7  | 1.014492754 | 0.023228 | 4173, 4172, 4175, 4174, 2237, 4176, 4171                             | 24.66083 |
| KEGG_PATHWAY | hsa00630:Glyoxylate and dicarboxylate metabolism                | 6  | 0.869565217 | 0.001699 | 4522, 1431, 9380, 4191, 4190, 50                                     | 2.027951 |
| KEGG_PATHWAY | hsa00052:Galactose metabolism                                   | 6  | 0.869565217 | 0.021048 | 3098, 2584, 231, 5214, 5213, 5211                                    | 22.61049 |
| KEGG_PATHWAY | hsa00640:Propanoate metabolism                                  | 6  | 0.869565217 | 0.047451 | 1892, 223, 3939, 3030, 501, 3945                                     | 44.33057 |
| KEGG_PATHWAY | hsa00062:Fatty acid elongation in                               | 4  | 0.579710145 | 0.010904 | 3033, 1892, 3032, 3030                                               | 12.37453 |

---

|              |                                                             |   |             |          |                      |          |
|--------------|-------------------------------------------------------------|---|-------------|----------|----------------------|----------|
| KEGG_PATHWAY | mitochondria<br>hsa00903:Limonene and pinene<br>degradation | 4 | 0.579710145 | 0.053548 | 1892, 223, 3030, 501 | 48.47577 |
|--------------|-------------------------------------------------------------|---|-------------|----------|----------------------|----------|

---

**Table S2 | Eighty differentially expressed proteins were identified in MCF-7/ADR compared to MCF-7.**

| Uniprot accession no. | Protein Description                                                                    | Coverage | # Unique Peptides | Molecular Function                                                                         | Cellular Component                                                       | Biological Process                                                                                                                                                                                                                                                         | Gene IDs | 127/126 | MW [kDa] | calc. pI |
|-----------------------|----------------------------------------------------------------------------------------|----------|-------------------|--------------------------------------------------------------------------------------------|--------------------------------------------------------------------------|----------------------------------------------------------------------------------------------------------------------------------------------------------------------------------------------------------------------------------------------------------------------------|----------|---------|----------|----------|
| P05787                | Keratin, type II cytoskeletal 8<br>OS=Homo sapiens<br>GN=KRT8 PE=1 SV=7 - [K2C8_HUMAN] | 56.52    | 28                | catalytic activity; motor activity; structural molecule activity; protein binding          | nucleus; organelle lumen; cytoplasm; cytoskeleton; membrane              | cell death; cell organization and biogenesis; cell communication; regulation of biological process; response to stimulus; cell differentiation; development                                                                                                                | 3856     | 0.52    | 53.7     | 5.59     |
| Q14315-2              | Isoform 2 of Filamin-C<br>OS=Homo sapiens<br>GN=FLNC - [FLNC_HUMAN]                    | 31.28    | 51                | protein binding                                                                            | cytoplasm; cytosol; cytoskeleton; membrane                               | cell organization and biogenesis; cell differentiation                                                                                                                                                                                                                     | 2318     | 1.73    | 287.1    | 5.97     |
| P07355                | Annexin A2<br>OS=Homo sapiens<br>GN=ANXA2 PE=1 SV=2 - [ANXA2_HUMAN]                    | 56.05    | 20                | enzyme regulator activity; metal ion binding; protein binding<br>DNA binding; RNA binding; | extracellular; cytoplasm; endosome; membrane                             | development; metabolic process; regulation of biological process; transport; cell organization and biogenesis; coagulation; response to stimulus; cell proliferation                                                                                                       | 302      | 1.907   | 38.6     | 7.75     |
| P04083                | Annexin A1<br>OS=Homo sapiens<br>GN=ANXA1 PE=1 SV=2 - [ANXA1_HUMAN]                    | 60.69    | 17                | enzyme regulator activity; protein binding; structural molecule activity;                  | cytoskeleton; extracellular; nucleus; cytoplasm; membrane; mitochondrion | defense response; regulation of biological process; response to stimulus; cellular component movement; cell communication; metabolic process; transport; cell differentiation; development; cell organization and biogenesis; cell death; cell proliferation; reproduction | 301      | 1.501   | 38.7     | 7.02     |

|        |                                                                                              |       |    |                                                                               |                                                                  |                                                                                                                                                           |      |       |       |      |  |
|--------|----------------------------------------------------------------------------------------------|-------|----|-------------------------------------------------------------------------------|------------------------------------------------------------------|-----------------------------------------------------------------------------------------------------------------------------------------------------------|------|-------|-------|------|--|
|        |                                                                                              |       |    |                                                                               | metal ion binding                                                |                                                                                                                                                           |      |       |       |      |  |
| P04075 | Fructose-bisphosphate aldolase A<br>OS=Homo sapiens<br>GN=ALDOA<br>PE=1 SV=2 - [ALDOA_HUMAN] | 48.9  | 18 | protein binding; catalytic activity                                           | extracellular; cytoplasm; cytosol; cytoskeleton; organelle lumen | transport; metabolic process; cell organization and biogenesis; coagulation; response to stimulus; regulation of biological process; cellular homeostasis | 226  | 0.612 | 39.4  | 8.09 |  |
| P08758 | Annexin A5<br>OS=Homo sapiens<br>GN=ANXA5<br>PE=1 SV=2 - [ANXA5_HUMAN]                       | 71.25 | 20 | enzyme regulator activity; metal ion binding; protein binding                 | cytoplasm; cell surface; membrane; extracellular                 | cell communication; regulation of biological process; response to stimulus; coagulation; cell death; metabolic process; cell organization and biogenesis  | 308  | 1.554 | 35.9  | 5.05 |  |
| P08727 | Keratin, type I cytoskeletal 19<br>OS=Homo sapiens<br>GN=KRT19<br>PE=1 SV=4 - [K1C19_HUMAN]  | 51.75 | 17 | structural molecule activity; protein binding                                 | cytoskeleton; membrane; cytoplasm                                | response to stimulus; cell differentiation; cell organization and biogenesis; development                                                                 | 3880 | 0.414 | 44.1  | 5.14 |  |
| P08183 | Multidrug resistance protein 1<br>OS=Homo sapiens<br>GN=ABCB1<br>PE=1 SV=3 - [MDR1_HUMAN]    | 26.33 | 30 | nucleotide binding; transporter activity; protein binding; catalytic activity | cytoplasm; Golgi; membrane; cell surface                         | metabolic process; transport; response to stimulus; cell proliferation                                                                                    | 5243 | 1.915 | 141.4 | 9    |  |
| P02768 | Serum albumin<br>OS=Homo sapiens<br>GN=ALB<br>PE=1 SV=2 - [ALBU_HUMAN]                       | 34.81 | 20 | DNA binding; metal ion binding; protein binding; antioxidant                  | extracellular; cytoplasm; organelle lumen                        | transport; metabolic process; response to stimulus; coagulation; cell communication; cell death; regulation of biological process                         | 213  | 2.017 | 69.3  | 6.28 |  |

|        |                                                                                                        |       |    |                                                                                    |                                                                                                                       |                                                                                                                                                                                                                                                                                          |      |       |      |      |  |  |
|--------|--------------------------------------------------------------------------------------------------------|-------|----|------------------------------------------------------------------------------------|-----------------------------------------------------------------------------------------------------------------------|------------------------------------------------------------------------------------------------------------------------------------------------------------------------------------------------------------------------------------------------------------------------------------------|------|-------|------|------|--|--|
|        |                                                                                                        |       |    | activity;<br>catalytic<br>activity                                                 |                                                                                                                       |                                                                                                                                                                                                                                                                                          |      |       |      |      |  |  |
| P02647 | Apolipoprotein<br>A-I OS=Homo<br>sapiens<br>GN=APOA1<br>PE=1 SV=1 -<br>[APOA1_HUM<br>AN]               | 49.81 | 13 | transporter<br>activity;<br>protein<br>binding;<br>enzyme<br>regulator<br>activity | extracellular; nucleus;<br>cytoplasm; endosome;<br>endoplasmic<br>reticulum; organelle<br>lumen; cytosol;<br>membrane | metabolic process; regulation<br>of biological process; cell<br>proliferation; transport;<br>response to stimulus; cell<br>communication; coagulation;<br>cell organization and<br>biogenesis; cell differentiation;<br>development; cellular<br>component movement; defense<br>response | 335  | 1.864 | 30.8 | 5.76 |  |  |
| P04792 | Heat shock<br>protein beta-1<br>OS=Homo<br>sapiens<br>GN=HSPB1<br>PE=1 SV=2 -<br>[HSPB1_HUMA<br>N]     | 43.9  | 9  | protein<br>binding;<br>enzyme<br>regulator<br>activity                             | proteasome; nucleus;<br>cytoplasm;<br>cytoskeleton; cytosol;<br>membrane; cell<br>surface                             | development; metabolic<br>process; regulation of<br>biological process; cellular<br>component movement;<br>response to stimulus; cell<br>death; cell communication                                                                                                                       | 3315 | 0.551 | 22.8 | 6.4  |  |  |
| P08729 | Keratin, type II<br>cytoskeletal 7<br>OS=Homo<br>sapiens<br>GN=KRT7 PE=1<br>SV=5 -<br>[K2C7_HUMAN<br>] | 39.87 | 16 | structural<br>molecule<br>activity;<br>protein<br>binding                          | nucleus; organelle<br>lumen; cytoplasm;<br>Golgi; cytoskeleton                                                        | metabolic process; regulation<br>of biological process; cell<br>organization and biogenesis                                                                                                                                                                                              | 3855 | 1.844 | 51.4 | 5.48 |  |  |
| P09211 | Glutathione<br>S-transferase P<br>OS=Homo<br>sapiens<br>GN=GSTP1<br>PE=1 SV=2 -<br>[GSTP1_HUMA<br>N]   | 52.86 | 8  | catalytic<br>activity;<br>protein<br>binding;<br>enzyme<br>regulator<br>activity   | nucleus; cytoplasm;<br>mitochondrion;<br>cytosol                                                                      | response to stimulus; defense<br>response; regulation of<br>biological process; metabolic<br>process; development; cell<br>communication; cell<br>proliferation; cell death                                                                                                              | 2950 | 1.612 | 23.3 | 5.64 |  |  |
| P06744 | Glucose-6-phosp<br>hate isomerase<br>OS=Homo<br>sapiens GN=GPI                                         | 23.3  | 12 | catalytic<br>activity;<br>protein<br>binding                                       | extracellular; nucleus;<br>organelle lumen;<br>cytoplasm; cytosol;<br>membrane                                        | development; metabolic<br>process; response to stimulus;<br>cell death; regulation of<br>biological process                                                                                                                                                                              | 2821 | 0.667 | 63.1 | 8.32 |  |  |



|          |                                                                                                         |       |    |                                                               |                                                                            |                                                                                                                          |      |       |      |       |
|----------|---------------------------------------------------------------------------------------------------------|-------|----|---------------------------------------------------------------|----------------------------------------------------------------------------|--------------------------------------------------------------------------------------------------------------------------|------|-------|------|-------|
| P07339   | PE=1 SV=4 -<br>[G6PI_HUMAN]<br>Cathepsin D<br>OS=Homo sapiens<br>GN=CTSD<br>PE=1 SV=1 -<br>[CATD_HUMAN] | 34.47 | 11 | catalytic activity;<br>protein binding                        | extracellular;<br>cytoplasm;<br>mitochondrion;<br>vacuole; organelle lumen | cell communication; cell organization and biogenesis; metabolic process; response to stimulus; cell death                | 1509 | 0.523 | 44.5 | 6.54  |
| P16402   | Histone H1.3<br>OS=Homo sapiens<br>GN=HIST1H1D<br>PE=1 SV=2 -<br>[H13_HUMAN]                            | 32.58 | 3  | DNA binding                                                   | chromosome; nucleus;<br>organelle lumen                                    | cell organization and biogenesis; metabolic process                                                                      | 3007 | 0.456 | 22.3 | 11.02 |
| P07195   | L-lactate<br>dehydrogenase B chain<br>OS=Homo sapiens<br>GN=LDHB<br>PE=1 SV=2 -<br>[LDHB_HUMAN]         | 40.12 | 10 | catalytic activity;<br>protein binding;<br>nucleotide binding | cytoplasm;<br>mitochondrion;<br>cytosol                                    | metabolic process                                                                                                        | 3945 | 2.311 | 36.6 | 6.05  |
| P11413   | Glucose-6-phosphate<br>1-dehydrogenase<br>OS=Homo sapiens<br>GN=G6PD<br>PE=1 SV=4 -<br>[G6PD_HUMAN]     | 31.46 | 15 | catalytic activity;<br>protein binding;<br>nucleotide binding | nucleus; cytoplasm;<br>cytoskeleton; cytosol;<br>membrane                  | metabolic process; regulation of biological process; response to stimulus; cell differentiation; development; cell death | 2539 | 0.498 | 59.2 | 6.84  |
| P08133-2 | Isoform 2 of Annexin A6<br>OS=Homo sapiens<br>GN=ANXA6 -<br>[ANXA6_HUMAN]                               | 33.39 | 20 | metal ion binding;<br>protein binding                         | membrane; cytoplasm;<br>extracellular                                      | transport; regulation of biological process                                                                              | 309  | 1.501 | 72.4 | 5.6   |
| P48735   | Isocitrate                                                                                              | 40.49 | 15 | metal ion                                                     | cytoplasm;                                                                 | metabolic process                                                                                                        | 3418 | 0.643 | 50.9 | 8.69  |

|          |                                                                                                                                                                                                               |       |    |                                                                          |                                                          |       |       |       |      |                                                                                                                                           |  |
|----------|---------------------------------------------------------------------------------------------------------------------------------------------------------------------------------------------------------------|-------|----|--------------------------------------------------------------------------|----------------------------------------------------------|-------|-------|-------|------|-------------------------------------------------------------------------------------------------------------------------------------------|--|
|          | dehydrogenase<br>[NADP],<br>mitochondrial<br>OS=Homo<br>sapiens<br>GN=IDH2 PE=1<br>SV=2 -<br>[IDHP_HUMAN<br>]<br>Isoform 2 of<br>Acidic<br>leucine-rich<br>nuclear<br>phosphoprotein<br>32 family<br>member B | 37.44 | 3  | binding;<br>catalytic<br>activity;<br>nucleotide<br>binding              | mitochondrion;<br>membrane; organelle<br>lumen           |       |       |       |      |                                                                                                                                           |  |
| Q92688-2 | OS=Homo<br>sapiens<br>GN=ANP32B -<br>[AN32B_HUMA<br>N]                                                                                                                                                        |       |    |                                                                          | nucleus; cytoplasm                                       | 10541 | 0.627 | 22.3  | 4.3  |                                                                                                                                           |  |
| P00738   | Haptoglobin<br>OS=Homo<br>sapiens GN=HP<br>PE=1 SV=1 -<br>[HPT_HUMAN]                                                                                                                                         | 27.09 | 11 | catalytic<br>activity;<br>protein<br>binding;<br>antioxidant<br>activity | extracellular;<br>cytoplasm; organelle<br>lumen          | 3240  | 2.277 | 45.2  | 6.58 | metabolic process; cellular<br>homeostasis; defense response;<br>response to stimulus; cell<br>death; regulation of biological<br>process |  |
| Q01469   | Fatty<br>acid-binding<br>protein,<br>epidermal<br>OS=Homo<br>sapiens<br>GN=FABP5<br>PE=1 SV=3 -<br>[FABP5_HUMA<br>N]                                                                                          | 64.44 | 7  | transporter<br>activity;<br>protein<br>binding                           | cytoplasm                                                | 2171  | 2.122 | 15.2  | 7.01 | metabolic process; transport;<br>development; response to<br>stimulus                                                                     |  |
| P01023   | Alpha-2-macroglobulin<br>OS=Homo<br>sapiens                                                                                                                                                                   | 11.26 | 14 | protein<br>binding;<br>enzyme<br>regulator                               | extracellular;<br>cytoplasm; cytosol;<br>organelle lumen | 2     | 1.651 | 163.2 | 6.46 | defense response; metabolic<br>process; regulation of<br>biological process; response to<br>stimulus; transport; cell                     |  |

|        |                                                                                                      |       |    |                                                                                                 |                                                                              |                                                                                                                                                                                          |      |       |      |      |
|--------|------------------------------------------------------------------------------------------------------|-------|----|-------------------------------------------------------------------------------------------------|------------------------------------------------------------------------------|------------------------------------------------------------------------------------------------------------------------------------------------------------------------------------------|------|-------|------|------|
|        | GN=A2M PE=1<br>SV=3 -<br>[A2MG_HUMAN]                                                                |       |    | activity                                                                                        |                                                                              | communication; coagulation;<br>cell differentiation                                                                                                                                      |      |       |      |      |
| P01024 | Complement C3<br>OS=Homo<br>sapiens GN=C3<br>PE=1 SV=2 -<br>[CO3_HUMAN]                              | 13.53 | 20 | enzyme<br>regulator<br>activity;<br>protein<br>binding                                          | extracellular;<br>membrane                                                   | defense response; regulation of<br>biological process; response to<br>stimulus; metabolic process;<br>cell communication; transport;<br>development; cell organization<br>and biogenesis | 718  | 1.518 | 187  | 6.4  |
| P01857 | Ig gamma-1<br>chain C region<br>OS=Homo<br>sapiens<br>GN=IGHG1<br>PE=1 SV=1 -<br>[IGHG1_HUMAN]       | 32.42 | 7  | protein<br>binding                                                                              | extracellular;<br>membrane                                                   | response to stimulus; metabolic<br>process; regulation of<br>biological process; cell<br>communication; transport;<br>defense response                                                   | 3500 | 1.598 | 36.1 | 8.19 |
| P00918 | Carbonic<br>anhydrase 2<br>OS=Homo<br>sapiens<br>GN=CA2 PE=1<br>SV=2 -<br>[CAH2_HUMAN]               | 33.85 | 7  | catalytic<br>activity;<br>protein<br>binding;<br>metal ion<br>binding                           | extracellular;<br>cytoplasm; cytosol;<br>membrane                            | development; metabolic<br>process; response to stimulus;<br>transport; cellular homeostasis;<br>regulation of biological<br>process; cell communication;<br>cell differentiation         | 760  | 0.545 | 29.2 | 7.4  |
| P01009 | Alpha-1-antitryp<br>sin OS=Homo<br>sapiens<br>GN=SERPINA1<br>PE=1 SV=3 -<br>[A1AT_HUMAN]             | 21.77 | 9  | protein<br>binding;<br>enzyme<br>regulator<br>activity                                          | extracellular;<br>cytoplasm;<br>endoplasmic<br>reticulum; organelle<br>lumen | response to stimulus; transport;<br>defense response; coagulation;<br>metabolic process; regulation<br>of biological process                                                             | 5265 | 1.896 | 46.7 | 5.59 |
| O75874 | Isocitrate<br>dehydrogenase<br>[NADP]<br>cytoplasmic<br>OS=Homo<br>sapiens<br>GN=IDH1 PE=1<br>SV=2 - | 28.5  | 10 | metal ion<br>binding;<br>catalytic<br>activity;<br>protein<br>binding;<br>nucleotide<br>binding | cytoplasm;<br>mitochondrion;<br>organelle lumen;<br>cytosol                  | metabolic process; response to<br>stimulus; development;<br>reproduction                                                                                                                 | 3417 | 0.568 | 46.6 | 7.01 |

|        |                                                                                                    |       |   |                                                                            |                                                                                                            |                                                                                                                                                                                                         |       |       |      |      |
|--------|----------------------------------------------------------------------------------------------------|-------|---|----------------------------------------------------------------------------|------------------------------------------------------------------------------------------------------------|---------------------------------------------------------------------------------------------------------------------------------------------------------------------------------------------------------|-------|-------|------|------|
| Q13185 | [IDHC_HUMAN]<br>Chromobox protein homolog 3 OS=Homo sapiens<br>GN=CBX3<br>PE=1 SV=4 - [CBX3_HUMAN] | 42.08 | 6 | protein binding                                                            | chromosome; nucleus; membrane; organelle lumen; cytoskeleton                                               | cell organization and biogenesis; metabolic process; regulation of biological process                                                                                                                   | 11335 | 0.642 | 20.8 | 5.33 |
| P17931 | Galectin-3 OS=Homo sapiens<br>GN=LGALS3<br>PE=1 SV=5 - [LEG3_HUMAN]                                | 28.4  | 6 | protein binding                                                            | extracellular; nucleus; spliceosomal complex; cytoplasm; membrane; mitochondrion                           | development; metabolic process; cell differentiation; cell organization and biogenesis; defense response; response to stimulus                                                                          | 3958  | 0.657 | 26.1 | 8.56 |
| P09467 | Fructose-1,6-bisphosphatase 1 OS=Homo sapiens<br>GN=FBP1 PE=1 SV=5 - [F16P1_HUMAN]                 | 27.22 | 8 | catalytic activity; protein binding; nucleotide binding; metal ion binding | cytoplasm; cytosol                                                                                         | metabolic process; regulation of biological process; cell growth; cell organization and biogenesis; response to stimulus; cell communication                                                            | 2203  | 0.668 | 36.8 | 6.99 |
| Q9Y696 | Chloride intracellular channel protein 4 OS=Homo sapiens<br>GN=CLIC4<br>PE=1 SV=4 - [CLIC4_HUMAN]  | 41.5  | 8 | transporter activity; protein binding                                      | nucleus; cytoplasm; mitochondrion; vacuole; cytoskeleton; cytosol; membrane; cell surface; organelle lumen | development; cell differentiation; cell organization and biogenesis; transport; cellular homeostasis; reproduction; cellular component movement; regulation of biological process; response to stimulus | 25932 | 1.679 | 28.8 | 5.59 |
| P51572 | B-cell receptor-associated protein 31 OS=Homo sapiens<br>GN=BCAP31<br>PE=1 SV=3 -                  | 32.11 | 9 | protein binding                                                            | cytoplasm; Golgi; membrane; endoplasmic reticulum; cytosol                                                 | transport; cell death; cell organization and biogenesis; response to stimulus; cellular homeostasis; reproduction; cell communication; regulation of biological process; metabolic process              | 10134 | 0.547 | 28   | 8.44 |

|          |                                                                                                           |       |    |                                                                                                                |                                                                   |                                                                                                                                                    |       |       |      |      |
|----------|-----------------------------------------------------------------------------------------------------------|-------|----|----------------------------------------------------------------------------------------------------------------|-------------------------------------------------------------------|----------------------------------------------------------------------------------------------------------------------------------------------------|-------|-------|------|------|
| P68871   | [BAP31_HUMAN]<br>Hemoglobin subunit beta<br>OS=Homo sapiens<br>GN=HBB PE=1 SV=2 -<br>[HBB_HUMAN]          | 57.14 | 7  | antioxidant activity;<br>catalytic activity;<br>transporter activity;<br>metal ion binding;<br>protein binding | extracellular;<br>cytoplasm; cytosol;<br>organelle lumen          | transport; coagulation; response to stimulus; cell death;<br>regulation of biological process; metabolic process; cell organization and biogenesis | 3043  | 1.516 | 16   | 7.28 |
| P15121   | Aldose reductase<br>OS=Homo sapiens<br>GN=AKR1B1 PE=1 SV=3 -<br>[ALDR_HUMAN]                              | 17.09 | 4  | catalytic activity                                                                                             | extracellular; nucleus;<br>organelle lumen;<br>cytoplasm; cytosol | metabolic process; response to stimulus                                                                                                            | 231   | 1.841 | 35.8 | 6.98 |
| POCG05   | Ig lambda-2 chain C regions<br>OS=Homo sapiens<br>GN=IGLC2 PE=1 SV=1 -<br>[LAC2_HUMAN]                    | 48.11 | 4  | protein binding                                                                                                | extracellular;<br>membrane                                        | metabolic process; regulation of biological process; response to stimulus; cell communication; transport; defense response                         | 3538  | 1.618 | 11.3 | 7.24 |
| Q9UHB6-2 | Isoform Alpha of LIM domain and actin-binding protein 1<br>OS=Homo sapiens<br>GN=LIMA1 -<br>[LIMA1_HUMAN] | 26.38 | 13 | protein binding;<br>metal ion binding                                                                          | cytoskeleton;<br>cytoplasm; membrane                              | cell organization and biogenesis; regulation of biological process                                                                                 | 51474 | 1.748 | 67.1 | 5.88 |
| Q96CN7   | Isochorismatase domain-containing protein 1<br>OS=Homo sapiens                                            | 19.46 | 5  | catalytic activity                                                                                             | cytoplasm                                                         | metabolic process                                                                                                                                  | 51015 | 0.613 | 32.2 | 7.39 |

|           |                                                                                                                                   |       |   |                                                                                                             |                                                              |                                                                                                                                                                                                      |      |       |      |       |
|-----------|-----------------------------------------------------------------------------------------------------------------------------------|-------|---|-------------------------------------------------------------------------------------------------------------|--------------------------------------------------------------|------------------------------------------------------------------------------------------------------------------------------------------------------------------------------------------------------|------|-------|------|-------|
| P02765    | GN=ISOC1<br>PE=1 SV=3 -<br>[ISOC1_HUMAN]<br>Alpha-2-HS-glycoprotein<br>OS=Homo sapiens<br>GN=AHSG<br>PE=1 SV=1 -<br>[FETUA_HUMAN] | 15.53 | 6 | enzyme regulator activity                                                                                   | extracellular                                                | development; transport; defense response; response to stimulus; reproduction; metabolic process; regulation of biological process; cell growth; cell organization and biogenesis; cell communication | 197  | 2.102 | 39.3 | 5.72  |
| P16070-18 | Isoform 18 of CD44 antigen<br>OS=Homo sapiens<br>GN=CD44 -<br>[CD44_HUMAN]                                                        | 18.82 | 6 | catalytic activity; receptor activity; signal transducer activity; protein binding<br>antioxidant activity; | membrane; cell surface                                       | development; defense response; response to stimulus; metabolic process; regulation of biological process; cell communication; cell organization and biogenesis; cell death; reproduction             | 960  | 1.936 | 37.3 | 5.52  |
| P69905    | Hemoglobin subunit alpha<br>OS=Homo sapiens<br>GN=HBA1<br>PE=1 SV=2 -<br>[HBA_HUMAN]                                              | 25.35 | 3 | catalytic activity; transporter activity; metal ion binding; protein binding                                | extracellular; cytoplasm; cytosol; ribosome; organelle lumen | transport; cell death; regulation of biological process; response to stimulus; metabolic process; cell organization and biogenesis                                                                   | 3040 | 2.291 | 15.2 | 8.68  |
| P17096-2  | Isoform HMG-Y of High mobility group protein HMG-I/HMG-Y<br>OS=Homo sapiens<br>GN=HMGA1 -<br>[HMGA1_HUMAN]                        | 17.71 | 2 | DNA binding; catalytic activity; protein binding                                                            | chromosome; nucleus; organelle lumen; cytoplasm; cytosol     | metabolic process; response to stimulus; cell organization and biogenesis; regulation of biological process; cell proliferation                                                                      | 3159 | 3.484 | 10.7 | 10.32 |
| P01876    | Ig alpha-1 chain                                                                                                                  | 16.43 | 5 | protein                                                                                                     | extracellular                                                | response to stimulus; metabolic                                                                                                                                                                      | 3493 | 2.478 | 37.6 | 6.51  |

|        |                                                                                                           |       |   |                                                                       |                                             |                                                                                                                                                         |            |       |      |      |
|--------|-----------------------------------------------------------------------------------------------------------|-------|---|-----------------------------------------------------------------------|---------------------------------------------|---------------------------------------------------------------------------------------------------------------------------------------------------------|------------|-------|------|------|
|        | C region<br>OS=Homo<br>sapiens<br>GN=IGHA1<br>PE=1 SV=2 -<br>[IGHA1_HUMAN]                                |       |   | binding                                                               |                                             | process                                                                                                                                                 |            |       |      |      |
| Q8TD06 | Anterior gradient<br>protein 3<br>homolog<br>OS=Homo<br>sapiens<br>GN=AGR3<br>PE=1 SV=1 -<br>[AGR3_HUMAN] | 12.65 | 2 | protein<br>binding                                                    | extracellular                               |                                                                                                                                                         | 15546<br>5 | 0.449 | 19.2 | 7.99 |
| Q9Y2T3 | Guanine<br>deaminase<br>OS=Homo<br>sapiens<br>GN=GDA PE=1<br>SV=1 -<br>[GUAD_HUMAN]                       | 10.13 | 5 | metal ion<br>binding;<br>catalytic<br>activity                        | cytoplasm; cytosol                          | metabolic process;<br>development                                                                                                                       | 9615       | 1.852 | 51   | 5.68 |
| O75223 | Gamma-glutamy<br>lcylotransferase<br>OS=Homo<br>sapiens<br>GN=GGCT<br>PE=1 SV=1 -<br>[GGCT_HUMAN]         | 21.28 | 4 | catalytic<br>activity;<br>protein<br>binding                          | cytoplasm; cytosol                          | cell communication; cell death;<br>cell organization and<br>biogenesis; regulation of<br>biological process; response to<br>stimulus; metabolic process | 79017      | 0.631 | 21   | 5.14 |
| P17655 | Calpain-2<br>catalytic subunit<br>OS=Homo<br>sapiens<br>GN=CAPN2<br>PE=1 SV=6 -<br>[CAN2_HUMAN]           | 12.43 | 8 | catalytic<br>activity;<br>metal ion<br>binding;<br>protein<br>binding | chromosome; nucleus;<br>cytoplasm; membrane | response to stimulus;<br>development; metabolic<br>process; cell differentiation                                                                        | 824        | 1.568 | 79.9 | 4.98 |
| Q9Y6M1 | Isoform 2 of                                                                                              | 11.69 | 5 | nucleotide                                                            | nucleus; cytoplasm;                         | metabolic process; regulation                                                                                                                           | 10644      | 1.535 | 61.8 | 8.25 |

|        |                                                                                                      |       |   |                                                                       |                                                                                     |                                                                                                                                                                                    |      |       |      |      |
|--------|------------------------------------------------------------------------------------------------------|-------|---|-----------------------------------------------------------------------|-------------------------------------------------------------------------------------|------------------------------------------------------------------------------------------------------------------------------------------------------------------------------------|------|-------|------|------|
| -1     | Insulin-like growth factor 2 mRNA-binding protein 2<br>OS=Homo sapiens<br>GN=IGF2BP2 - [IF2B2_HUMAN] |       |   | binding; RNA binding; protein binding; translation regulator activity | cytosol; cytoskeleton                                                               | of biological process; transport                                                                                                                                                   |      |       |      |      |
| P02656 | Apolipoprotein C-III<br>OS=Homo sapiens<br>GN=APOC3<br>PE=1 SV=1 - [APOC3_HUMAN]                     | 27.27 | 2 | enzyme regulator activity; protein binding                            | extracellular; cytoplasm; endosome                                                  | metabolic process; transport; defense response; response to stimulus; cell communication; regulation of biological process; cell organization and biogenesis; cellular homeostasis | 345  | 1.874 | 10.8 | 5.41 |
| P17661 | Desmin<br>OS=Homo sapiens<br>GN=DES PE=1 SV=3 - [DESM_HUMAN]                                         | 5.53  | 2 | structural molecule activity; protein binding                         | cytoplasm; cytosol; cytoskeleton; membrane                                          | cell organization and biogenesis; regulation of biological process; cellular component movement                                                                                    | 1674 | 1.692 | 53.5 | 5.27 |
| P05114 | Non-histone chromosomal protein HMG-14<br>OS=Homo sapiens<br>GN=HMGN1<br>PE=1 SV=3 - [HMGN1_HUMAN]   | 40    | 4 | DNA binding; protein binding                                          | chromosome; nucleus; cytoplasm                                                      | metabolic process; response to stimulus; cell organization and biogenesis; regulation of biological process; development; cell proliferation                                       | 3150 | 0.588 | 10.7 | 9.6  |
| P02652 | Apolipoprotein A-II<br>OS=Homo sapiens<br>GN=APOA2<br>PE=1 SV=1 - [APOA2_HUMAN]                      | 19    | 3 | transporter activity; protein binding; enzyme regulator activity      | extracellular; cytoplasm; endosome; endoplasmic reticulum; organelle lumen; cytosol | metabolic process; defense response; response to stimulus; regulation of biological process; transport; cell communication; cell organization and biogenesis; development          | 336  | 2.141 | 11.2 | 6.62 |
| P13473 | Lysosome-associated membrane                                                                         | 4.88  | 2 |                                                                       | cytoplasm; vacuole; membrane; endosome                                              | transport; coagulation; response to stimulus                                                                                                                                       | 3920 | 0.431 | 44.9 | 5.63 |



|          |                                                                                                                                                                                    |       |   |                                                                        |                                                       |                                                                                                                                           |       |       |       |      |
|----------|------------------------------------------------------------------------------------------------------------------------------------------------------------------------------------|-------|---|------------------------------------------------------------------------|-------------------------------------------------------|-------------------------------------------------------------------------------------------------------------------------------------------|-------|-------|-------|------|
| P45973   | glycoprotein 2<br>OS=Homo<br>sapiens<br>GN=LAMP2<br>PE=1 SV=2 -<br>[LAMP2_HUMAN]<br>Chromobox<br>protein homolog<br>5 OS=Homo<br>sapiens<br>GN=CBX5<br>PE=1 SV=1 -<br>[CBX5_HUMAN] | 25.65 | 3 | protein<br>binding                                                     | nucleus; organelle<br>lumen; chromosome;<br>cytoplasm | coagulation; response to<br>stimulus; metabolic process;<br>regulation of biological process                                              | 23468 | 0.542 | 22.2  | 5.86 |
| Q9BS40   | Latexin<br>OS=Homo<br>sapiens<br>GN=LXN PE=1<br>SV=2 -<br>[LXN_HUMAN]                                                                                                              | 13.96 | 3 | enzyme<br>regulator<br>activity                                        | cytoplasm                                             | defense response; response to<br>stimulus; metabolic process;<br>regulation of biological process                                         | 56925 | 0.37  | 25.7  | 5.78 |
| P08243-3 | Isoform 3 of<br>Asparagine<br>synthetase<br>[glutamine-hydro<br>lyzing]<br>OS=Homo<br>sapiens<br>GN=ASNS -<br>[ASNS_HUMAN]                                                         | 3.97  | 2 | catalytic<br>activity;<br>nucleotide<br>binding;<br>protein<br>binding | cytoplasm; cytosol;<br>membrane                       | development; metabolic<br>process; cell communication;<br>regulation of biological<br>process; response to stimulus;<br>cell death        | 440   | 0.654 | 54.8  | 6.49 |
| Q13642-1 | Isoform 1 of<br>Four and a half<br>LIM domains<br>protein 1<br>OS=Homo<br>sapiens<br>GN=FHL1 -<br>[FHL1_HUMAN]                                                                     | 12.14 | 3 | protein<br>binding;<br>metal ion<br>binding                            | nucleus; cytoplasm;<br>cytosol; membrane              | regulation of biological<br>process; development; cell<br>differentiation; cell growth; cell<br>organization and biogenesis;<br>transport | 2273  | 1.644 | 31.9  | 8.32 |
| Q02952-3 | Isoform 3 of                                                                                                                                                                       | 3.76  | 7 | protein                                                                | cytoplasm;                                            | transport; cell communication;                                                                                                            | 9590  | 2.298 | 180.9 | 4.44 |

|          |                                                                                                                                                                                                                                                                                                                                                                                                                                                                 |       |   |                                            |                                                             |                                                                                  |       |       |      |      |
|----------|-----------------------------------------------------------------------------------------------------------------------------------------------------------------------------------------------------------------------------------------------------------------------------------------------------------------------------------------------------------------------------------------------------------------------------------------------------------------|-------|---|--------------------------------------------|-------------------------------------------------------------|----------------------------------------------------------------------------------|-------|-------|------|------|
|          | A-kinase anchor protein 12<br>OS=Homo sapiens<br>GN=AKAP12 - [AKA12_HUMAN]<br>Epithelial cell adhesion molecule<br>OS=Homo sapiens<br>GN=EPCAM<br>PE=1 SV=2 - [EPCAM_HUMAN]<br>Aspartyl aminopeptidase<br>OS=Homo sapiens<br>GN=DNPEP<br>PE=1 SV=1 - [DNPEP_HUMAN]<br>Peptidyl-prolyl cis-trans isomerase<br>FKBP10<br>OS=Homo sapiens<br>GN=FKBP10<br>PE=1 SV=1 - [FKB10_HUMAN]<br>Isoform 2 of Alpha-endosulfine<br>OS=Homo sapiens<br>GN=ENSA - [ENSA_HUMAN] |       |   | binding                                    | cytoskeleton; membrane                                      | regulation of biological process; response to stimulus; metabolic process        |       |       |      |      |
| P16422   |                                                                                                                                                                                                                                                                                                                                                                                                                                                                 | 8.6   | 2 | protein binding                            | membrane; cell surface                                      | development; cell proliferation; regulation of biological process                | 4072  | 0.616 | 34.9 | 7.46 |
| Q9ULA0   |                                                                                                                                                                                                                                                                                                                                                                                                                                                                 | 3.79  | 2 | catalytic activity; metal ion binding      | cytoplasm                                                   | metabolic process                                                                | 23549 | 0.67  | 52.4 | 7.42 |
| Q96AY3   |                                                                                                                                                                                                                                                                                                                                                                                                                                                                 | 7.22  | 4 | catalytic activity; metal ion binding      | cytoplasm; endoplasmic reticulum; organelle lumen; membrane | metabolic process                                                                | 60681 | 1.529 | 64.2 | 5.62 |
| O43768-2 |                                                                                                                                                                                                                                                                                                                                                                                                                                                                 | 27.35 | 3 | enzyme regulator activity; protein binding | nucleus; organelle lumen; cytoplasm                         | transport; cell division; cell organization and biogenesis; response to stimulus | 2029  | 0.655 | 13   | 8.27 |

|          |                                                                                                     |       |   |                                          |                                                      |                                                                                                                                                                     |       |       |       |      |
|----------|-----------------------------------------------------------------------------------------------------|-------|---|------------------------------------------|------------------------------------------------------|---------------------------------------------------------------------------------------------------------------------------------------------------------------------|-------|-------|-------|------|
| Q6UXG2-3 | Isoform 3 of UPF0577 protein KIAA1324<br>OS=Homo sapiens<br>GN=KIAA1324<br>-[K1324_HUMAN]           | 4.54  | 3 |                                          |                                                      |                                                                                                                                                                     | 57535 | 0.627 | 101.9 | 6.55 |
| P08962-3 | Isoform 3 of CD63 antigen<br>OS=Homo sapiens<br>GN=CD63 - [CD63_HUMAN]                              | 11.54 | 2 | protein binding                          | cytoplasm; membrane; vacuole; cell surface; endosome | transport; coagulation; response to stimulus; cellular component movement; regulation of biological process; cell differentiation; cell organization and biogenesis | 967   | 0.564 | 17.3  | 7.88 |
| P17516   | Aldo-keto reductase family 1 member C4<br>OS=Homo sapiens<br>GN=AKR1C4<br>PE=1 SV=3 - [AK1C4_HUMAN] | 4.64  | 2 | catalytic activity; transporter activity | cytoplasm; cytosol                                   | metabolic process; transport; cell communication; regulation of biological process; response to stimulus                                                            | 1109  | 0.523 | 37    | 6.93 |
| Q9NQW6-2 | Isoform 2 of Actin-binding protein anillin<br>OS=Homo sapiens<br>GN=ANLN - [ANLN_HUMAN]             | 1.66  | 2 | protein binding                          | nucleus; cytoplasm; cytoskeleton                     | cell division; cell organization and biogenesis; regulation of biological process                                                                                   | 54443 | 1.529 | 119.9 | 8.16 |
| Q12841   | Follistatin-related protein 1<br>OS=Homo sapiens<br>GN=FSTL1<br>PE=1 SV=1 - [FSTL1_HUMAN]           | 11.36 | 4 | metal ion binding; protein binding       | extracellular                                        | cell communication; metabolic process; regulation of biological process; response to stimulus                                                                       | 11167 | 2.29  | 35    | 5.52 |

|          |                                                                                                           |       |   |                                                                                                                             |                                                                                                                                  |                                                                                                                                                                                                       |      |       |      |      |
|----------|-----------------------------------------------------------------------------------------------------------|-------|---|-----------------------------------------------------------------------------------------------------------------------------|----------------------------------------------------------------------------------------------------------------------------------|-------------------------------------------------------------------------------------------------------------------------------------------------------------------------------------------------------|------|-------|------|------|
| Q9UN81   | LINE-1 retrotransposable element ORF1 protein<br>OS=Homo sapiens<br>GN=L1RE1<br>PE=1 SV=1 - [LORF1_HUMAN] | 6.51  | 2 | nucleotide binding;<br>DNA binding;<br>RNA binding;<br>structural molecule activity;<br>protein binding<br>protein binding; | cytoplasm; nucleus;<br>organelle lumen;<br>vacuole; endoplasmic reticulum                                                        |                                                                                                                                                                                                       | 4029 | 0.587 | 40   | 9.51 |
| P14735-2 | Isoform 2 of Insulin-degrading enzyme<br>OS=Homo sapiens<br>GN=IDE - [IDE_HUMAN]                          | 4.74  | 2 | catalytic activity;<br>nucleotide binding;<br>metal ion binding                                                             | extracellular; nucleus;<br>cytoplasm;<br>mitochondrion;<br>organelle lumen;<br>cytosol; membrane;<br>cell surface;<br>proteasome | metabolic process; cell communication; regulation of biological process; response to stimulus; development; cellular homeostasis; cell organization and biogenesis                                    | 3416 | 0.668 | 54.2 | 6.71 |
| Q05682-5 | Isoform 5 of Caldesmon<br>OS=Homo sapiens<br>GN=CALD1 - [CALD1_HUMAN]                                     | 5.83  | 3 | protein binding                                                                                                             | cytoplasm; cytosol;<br>cytoskeleton;<br>membrane                                                                                 | cellular component movement; cell organization and biogenesis                                                                                                                                         | 800  | 1.915 | 61.2 | 6.71 |
| P32320   | Cytidine deaminase<br>OS=Homo sapiens<br>GN=CDA<br>PE=1 SV=2 - [CDD_HUMAN]                                | 25.34 | 2 | catalytic activity;<br>metal ion binding;<br>protein binding                                                                | extracellular;<br>cytoplasm; cytosol                                                                                             | metabolic process; cell communication; regulation of biological process; response to stimulus; cell growth; cell organization and biogenesis                                                          | 978  | 1.904 | 16.2 | 6.92 |
| P10909-4 | Isoform 4 of Clusterin<br>OS=Homo sapiens<br>GN=CLU - [CLUS_HUMAN]                                        | 6.49  | 2 | protein binding;<br>catalytic activity                                                                                      | extracellular; nucleus;<br>cytoplasm;<br>mitochondrion;<br>endoplasmic reticulum;<br>cytosol;<br>organelle lumen;<br>membrane    | cell communication; cell death; cell organization and biogenesis; regulation of biological process; response to stimulus; transport; metabolic process; coagulation; cell proliferation; development; | 1191 | 1.529 | 48.8 | 6.71 |

|        |                                                                                                                                                                           |       |   |                                       |                                                                    |                                                                                                                                               |            |       |      |                                        |
|--------|---------------------------------------------------------------------------------------------------------------------------------------------------------------------------|-------|---|---------------------------------------|--------------------------------------------------------------------|-----------------------------------------------------------------------------------------------------------------------------------------------|------------|-------|------|----------------------------------------|
|        |                                                                                                                                                                           |       |   |                                       |                                                                    |                                                                                                                                               |            |       |      | defense response; cell differentiation |
| Q96DG6 | Carboxymethylenebutenolide homolog<br>OS=Homo sapiens<br>GN=CMBL PE=1 SV=1 - [CMBL_HUMAN]<br>Calponin-3<br>OS=Homo sapiens<br>GN=CNN3 PE=1 SV=1 - [CNN3_HUMAN]            | 12.24 | 3 | catalytic activity                    | cytoplasm; cytosol                                                 | metabolic process                                                                                                                             | 13414<br>7 | 0.372 | 28   | 7.18                                   |
| Q15417 | Persulfide dioxygenase<br>ETHE1, mitochondrial<br>OS=Homo sapiens<br>GN=ETHE1 PE=1 SV=2 - [ETHE1_HUMAN]<br>Drebrin<br>OS=Homo sapiens<br>GN=DBN1 PE=1 SV=4 - [DREB_HUMAN] | 6.38  | 2 | protein binding                       | cytoskeleton                                                       | cell organization and biogenesis; metabolic process; regulation of biological process                                                         | 1266       | 1.73  | 36.4 | 6.05                                   |
| O95571 | Cathepsin Z<br>OS=Homo sapiens<br>GN=CTSZ PE=1 SV=1 - [CATZ_HUMAN]                                                                                                        | 8.27  | 2 | metal ion binding; catalytic activity | nucleus; organelle lumen; cytoplasm; mitochondrion                 | metabolic process                                                                                                                             | 23474      | 1.555 | 27.9 | 6.83                                   |
| Q16643 |                                                                                                                                                                           | 4.31  | 2 | protein binding                       | cytoplasm; membrane; cytoskeleton                                  | cell organization and biogenesis; development; cell communication; cell differentiation; regulation of biological process; cell proliferation | 1627       | 1.744 | 71.4 | 4.45                                   |
| Q9UBR2 |                                                                                                                                                                           | 7.26  | 2 | catalytic activity                    | extracellular; cytoplasm; vacuole; endoplasmic reticulum; membrane | metabolic process; regulation of biological process; development                                                                              | 1522       | 1.564 | 33.8 | 7.11                                   |

---

|          |                                                                                                                |       |   |                                                                                  |                                                                    |                                                                                                                                                                                                              |       |       |      |      |
|----------|----------------------------------------------------------------------------------------------------------------|-------|---|----------------------------------------------------------------------------------|--------------------------------------------------------------------|--------------------------------------------------------------------------------------------------------------------------------------------------------------------------------------------------------------|-------|-------|------|------|
| P56159-2 | N]<br>Isoform 2 of<br>GDNF family<br>receptor alpha-1<br>OS=Homo<br>sapiens<br>GN=GFRA1 -<br>[GFRA1_HUM<br>AN] | 8.04  | 4 | receptor<br>activity;<br>protein<br>binding;<br>signal<br>transducer<br>activity | extracellular;<br>membrane; cell<br>surface                        | development; cell<br>communication; regulation of<br>biological process; response to<br>stimulus; cell differentiation;<br>cell organization and<br>biogenesis; cellular component<br>movement; reproduction | 2674  | 0.662 | 50.8 | 7.99 |
| Q17RY6   | Lymphocyte<br>antigen 6K<br>OS=Homo<br>sapiens<br>GN=LY6K<br>PE=1 SV=2 -<br>[LY6K_HUMA<br>N]                   | 13.33 | 2 |                                                                                  | extracellular; nucleus;<br>organelle lumen;<br>cytoplasm; membrane |                                                                                                                                                                                                              | 54742 | 1.825 | 18.7 | 7.43 |

---

**Table S3 | DEPS were enriched within KEGG pathway.**

| <b>Term</b>                         | <b>Count</b> | <b>%</b> | <b>P</b>       | <b>Genes Symbol</b>         |
|-------------------------------------|--------------|----------|----------------|-----------------------------|
| Glutathione metabolism              | 5            | 6.33     | <i>0.00027</i> | GGCT,G6PD,GSTP1, IDH1, IDH2 |
| Pentose phosphate pathway           | 4            | 5.06     | <i>0.00052</i> | ALDOA, FBP1, GPI, G6PD      |
| Glycolysis / Gluconeogenesis        | 4            | 5.06     | <i>0.00662</i> | ALDOA, FBP1,GPI,LDHB        |
| PPAR signaling pathway              | 4            | 5.06     | <i>0.00975</i> | APOA1, APOA, APOC3, F ABP5  |
| Fructose and mannose metabolism     | 3            | 3.80     | <i>0.02013</i> | AKR1B1, ALDOA, FBP1         |
| Lysosome                            | 4            | 5.06     | <i>0.03925</i> | CD63, CTSD, CTSZ, LAMP2     |
| Complement and coagulation cascades | 3            | 3.80     | <i>0.07319</i> | A2M, SERPINA1,C3            |

**Table S4 | Thirty-two modules were identified in network.**

| Module | Nodes | Edges | Gene symbol                                                                                                                               |
|--------|-------|-------|-------------------------------------------------------------------------------------------------------------------------------------------|
| 2      | 20    | 49    | DAXX, KRT18, CASP3, BCL2, CRYAA, HIPK2, TIAM1, HBEGF, CRYBB2, EGFR, CRYGC, BCL2L1, RET, HSPB1, BCAP31, CEACAM1, CRYAB, ERBB4, CD44, MAPK8 |
| 3      | 19    | 46    | PRKCA, EZR, ROCK1, SRC, INSR, NR3C1, DAG1, NF2, MSN, KDR, SP1, HNF1A, CD46, PRKACA, SHC1, HLA-A, ADRBK1, HSPA1A, EP300                    |
| 4      | 19    | 56    | CDC42, TP53, LCK, SLC9A1, RAF1, FGFR3, PPARG, HBB, DLG4, -, CASP9, MDFI, HBG2, MAP2K4, EWSR1, YWHAG, FYN, TGFBR1, PPA1                    |
| 12     | 17    | 36    | AR, HIST3H3, TRPM7, RPS6KA4, HDAC5, MBD1, CSK, RPS6KA3, CREBBP, MAPK1, KRT8, SMAD1, CASP8, DMD, PLAT, CBX5, HMGN2                         |
| 15     | 15    | 26    | DNMBP, PRNP, A2M, DNMT1, APOE, LEP, CTSE, NCAM1, HSPD1, GDNF, GFRA1, NGF, PDGFA, PDGFB, LEPR                                              |
| 1      | 8     | 16    | USHBP1, KRT15, ABI2, HGS, EXOC8, DGCR6L, KRT6B, KRT19                                                                                     |
| 8      | 7     | 10    | C3, CFB, CFH, CFP, CFI, C2, MASP1                                                                                                         |
| 14     | 7     | 14    | ABL1, SRF, GRB2, JUN, HMGA1, FHL2, RASA1                                                                                                  |
| 11     | 6     | 13    | CALM1, ZHX1, CSNK2A1, RELA, KPNA2, SAT1                                                                                                   |
| 13     | 6     | 11    | ALDOA, LGALS13, ACTG1, TUBB, HSPA8, DYNLL1                                                                                                |
| 23     | 6     | 10    | DLG1, APOH, PLG, TTR, PAPP, LRP2                                                                                                          |
| 6      | 5     | 9     | CBX1, HIST1H1E, CBX3, PIM1, CHAF1A                                                                                                        |
| 29     | 5     | 7     | XPO1, PRKCB, ANXA2, PHB, MYOC                                                                                                             |
| 21     | 4     | 6     | AGA, ALB, FCGRT, IGF2R                                                                                                                    |
| 5      | 3     | 6     | NSL1, MIS12, DSN1                                                                                                                         |
| 7      | 3     | 3     | HLA-DMB, HLA-DRA, CD63                                                                                                                    |
| 9      | 3     | 4     | CBX4, RING1, RNF2                                                                                                                         |
| 10     | 3     | 4     | TGFBI, FN1, COL2A1                                                                                                                        |
| 22     | 3     | 6     | CAV1, CEBPB, MAPK3                                                                                                                        |
| 28     | 3     | 5     | BIN1, FBP1, FXR2                                                                                                                          |
| 30     | 3     | 5     | PKN1, TRAF2, ACTN1                                                                                                                        |
| 16     | 2     | 3     | TRIM28, TRIM24                                                                                                                            |
| 17     | 2     | 3     | CPN1, C5                                                                                                                                  |
| 18     | 2     | 3     | ELANE, SERPINA1                                                                                                                           |



|    |   |   |                |
|----|---|---|----------------|
| 19 | 2 | 3 | PTN, LUC7L2    |
| 20 | 2 | 3 | TGFBR2, CDK1   |
| 24 | 2 | 3 | SHBG, PLP2     |
| 25 | 2 | 3 | S100A4, S100A1 |
| 26 | 2 | 3 | C1orf103, GC   |
| 27 | 2 | 3 | FURIN, LRP1    |
| 31 | 2 | 3 | KNG1, ITGB2    |
| 32 | 2 | 3 | INS, CTSB      |

---

**Table S5 | Relation of DEPs-one step interacting proteins.**

| <b>One step-protein</b> | <b>number</b> | <b>DEPs</b>                |
|-------------------------|---------------|----------------------------|
| SUMO4                   | 5             | GSTP1,G6PD,IDH1,ALDOA,LDHB |
| EGFR                    | 4             | ANXA1,KRT7,KRT8,CD44       |
| PRKCA                   | 4             | AKAP12,FLNC,ANXA2,HMGN1    |
| MYOC                    | 4             | A2M,LGALS3,ALDOA,ANXA2     |
| APP                     | 4             | CLU,CTSD,IDE,BCAP31        |
| LRP1                    | 3             | C3,SERPINA1,A2M            |
| IGFBP3                  | 3             | CTSD,GPI,CD44              |
| CSNK2A1                 | 3             | LGALS3,GPI,HMGA1           |
| KLK3                    | 3             | SERPINA1,ALB,A2M           |
| PON1                    | 3             | CLU,APOA1,ALB              |
| SLC2A4                  | 3             | CTSD,FKBP10,IDH2           |
| CTSB                    | 3             | ANXA2,CTSD,A2M             |
| SHBG                    | 3             | CTSD,DES,A2M               |
| TGM2                    | 3             | GSTP1,ALDOA,ANXA1          |
| MMP2                    | 2             | LGALS3,A2M                 |
| MMP7                    | 2             | CD44,SERPINA1              |
| GRB2                    | 2             | CALD1,ANXA2                |
| CDK1                    | 2             | CALD1,HMGA1                |
| CELA1                   | 2             | SERPINA1,A2M               |
| HBB                     | 2             | HP,HBA2                    |
| DMD                     | 2             | KRT19,KRT8                 |
| LBR                     | 2             | CBX3,CBX5                  |
| PLTP                    | 2             | APOA2,APOA1                |

|          |   |               |
|----------|---|---------------|
| ELN      | 2 | LGALS3,FKBP10 |
| S100A1   | 2 | ANXA6,DES     |
| ITGAM    | 2 | C3,HP         |
| TGFBR2   | 2 | CD44,CLU      |
| DSN1     | 2 | CBX3,CBX5     |
| CUBN     | 2 | ALB,LGALS3    |
| YWHAZ    | 2 | CLIC4,HMGN1   |
| CBX1     | 2 | CBX3,CBX5     |
| S100B    | 2 | ANXA6,DES     |
| C1orf103 | 2 | HSPB1,ETHE1   |
| APOF     | 2 | APOA2,APOA1   |
| YWHAG    | 2 | LIMA1,ALB     |
| PLAT     | 2 | KRT8,ANXA2    |
| DYNLL1   | 2 | CA2,ALDOA     |
| MAPK8    | 2 | GSTP1,KRT8    |
| TRIM28   | 2 | CBX3,CBX5     |
| SRC      | 2 | ANXA1,ANXA2   |
| MKI67    | 2 | CBX3,CBX5     |
| ACTG1    | 2 | ANXA5,BCAP31  |
| TAF4     | 2 | CBX5,CBX3     |
| ATF7IP   | 2 | KRT7,A2M      |
| APOA1BP  | 2 | APOA2,APOA1   |
| LEP      | 2 | A2M,CLU       |
| HIST3H3  | 2 | CBX5,CBX3     |
| HIST1H1E | 2 | CBX5,CBX3     |
| APOE     | 2 | ALB,A2M       |

|         |   |               |
|---------|---|---------------|
| CSNK2A2 | 2 | LGALS3, HMGA1 |
| TRIM24  | 2 | CBX3, CBX5    |
| ADRBK1  | 2 | CAPN2, AKAP12 |
| MIS12   | 2 | CBX3, CBX5    |
| LCAT    | 2 | APOA1, A2M    |
| NFKBIA  | 2 | HSPB1, CAPN2  |
| CD4     | 2 | CD44, CTSD    |
| PKD1    | 2 | DES, KRT8     |
| XRCC6   | 2 | CLU, CBX5     |
| ADAMTS4 | 2 | SERPINA1, HP  |
| TGFBR1  | 2 | CD44, CLU     |
| SRGN    | 2 | CD44, ALB     |
| CTSG    | 2 | C3, SERPINA1  |
| SUFU    | 2 | HMGA1, LGALS3 |
| PNN     | 2 | KRT19, KRT8   |
| DYSF    | 2 | ANXA1, ANXA2  |
| ZNF598  | 2 | DBN1, CDA     |
| FYN     | 2 | CNN3, CD44    |
| AP4M1   | 2 | LAMP2, CD63   |
| IGSF21  | 2 | HSPB1, ETHE1  |
| INS     | 2 | CTSD, IDE     |
| LRP2    | 2 | CLU, ALB      |
| AMBP    | 2 | ALB, A2M      |
| EIF4G1  | 2 | HSPB1, ANXA5  |
| CRYAA   | 2 | HSPB1, ALB    |
| HSPA5   | 2 | KRT8, A2M     |

|     |   |            |
|-----|---|------------|
| CR2 | 2 | ANXA6,C3   |
| SRF | 2 | HMGA1,FHL1 |

---

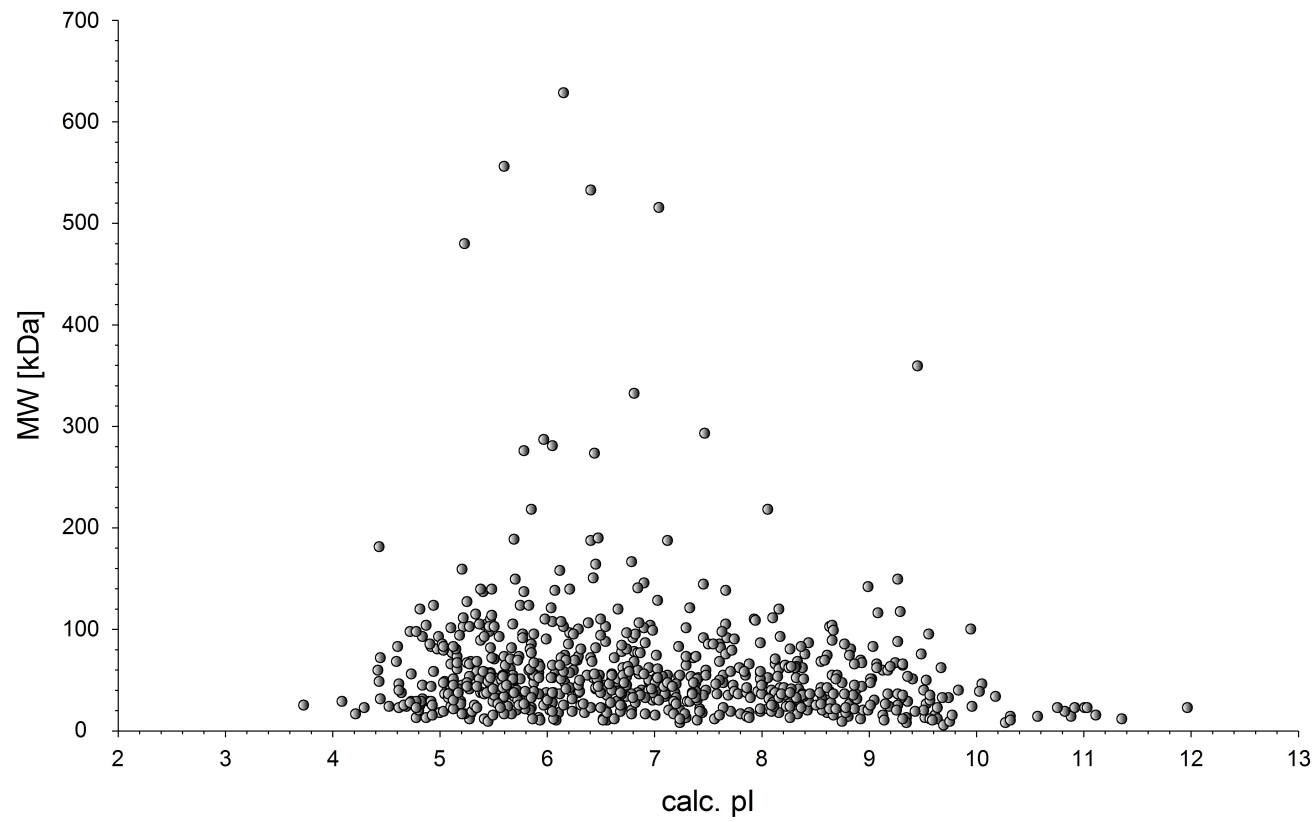

**Figure S1** | The molecular weights (MW) of the identified proteins spanned mainly from 10,000 to 200,000 Da. Most proteins had an isoelectric point (pI) between 4 and 10.

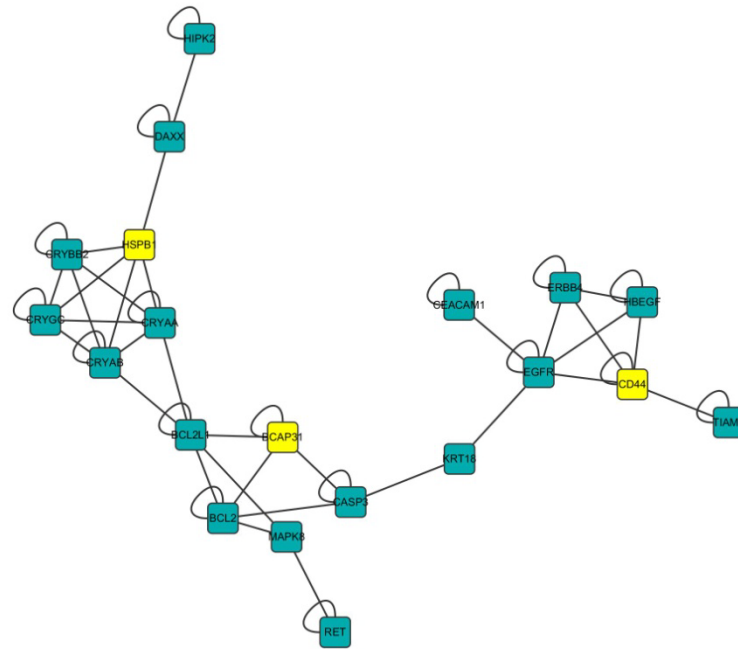

**Figure S2 | Functional network of identified the 2<sup>nd</sup> module.** This module contained 20 proteins which were enriched within 11 pathways, among them, there were six pathways associated with resistance, especially MAPK signal pathway. There were five proteins in MAPK signal pathway, including one pair of DEPs-one step interacting protein (HSPB1-DAXX).The yellow node indicates DEPs and the green node indicates one-step interacting protein.

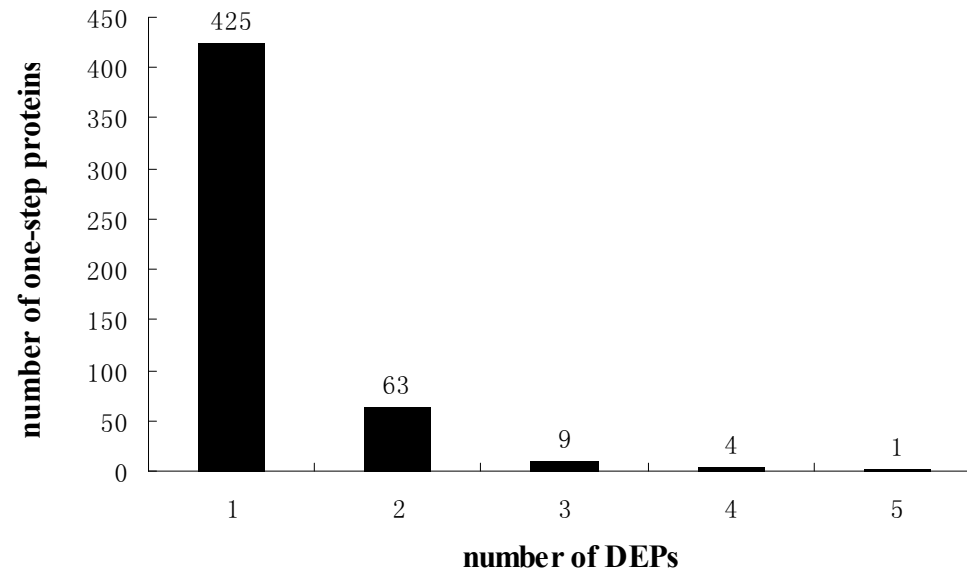

**Figure S3 | DEPs-one step interacting protein relations.** The number of DEPs interacting with one-step protein ranged from 1 to 5. It represented that 425 one-step proteins correlate with 1 DEPs, 63 one-step proteins correlate with 2 DEPs, 9 one-step proteins correlate with 3 DEPs, 4 one-step proteins correlate with 4 DEPs and 1 one-step protein correlate with 5 DEPs in the PPI.
